# Supplementary material
Source: ML conference proceedings conference paper supplement (https://openreview.net/forum?id=8jpSenKvoS)

Sample Quantiles

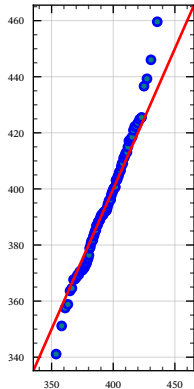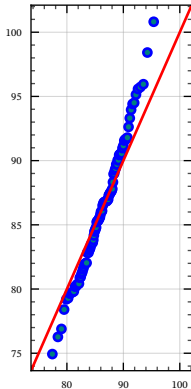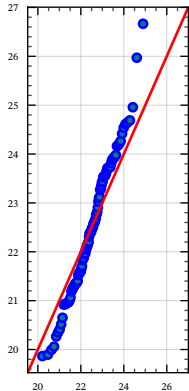

Theoretical Quantiles

Supplement: supplementary_material [file attachment]

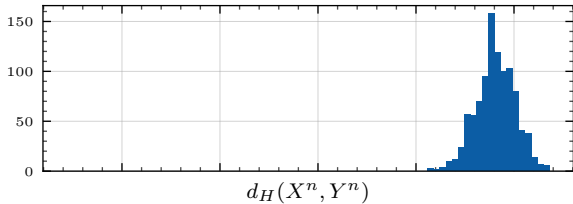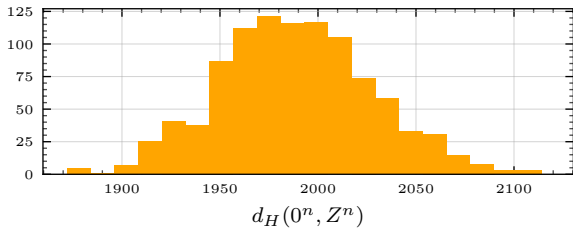

Supplement: supplementary_material [file attachment]

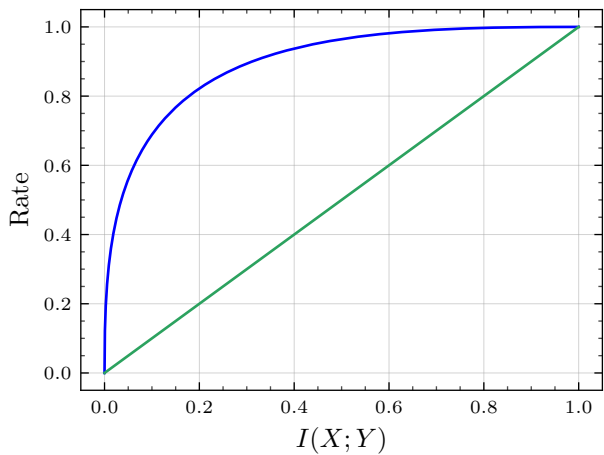

Supplement: supplementary_material [file attachment]

Redundancy

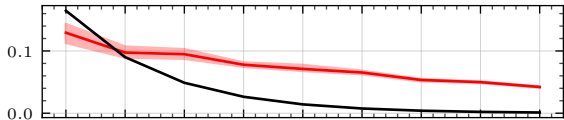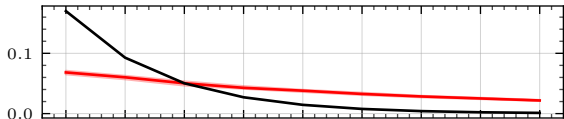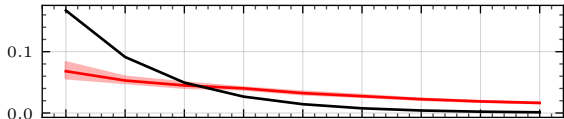

$\log n$

Supplement: supplementary_material [file attachment]

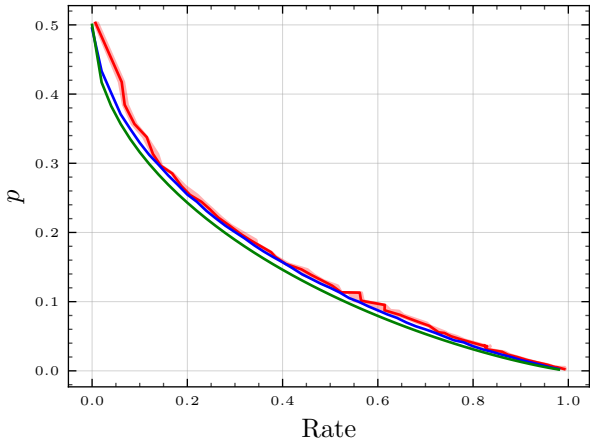

Supplement: supplementary_material [file attachment]

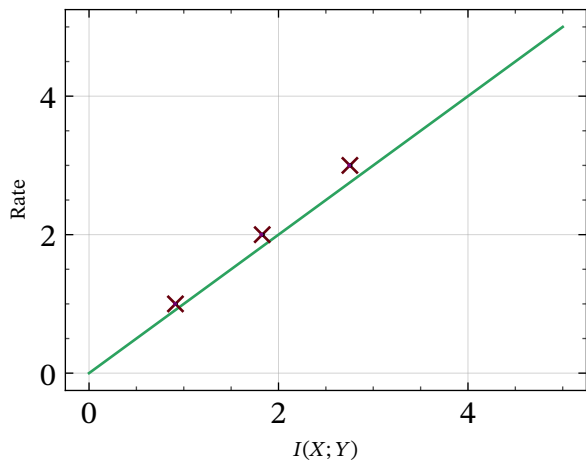

Supplement: supplementary_material [file attachment]

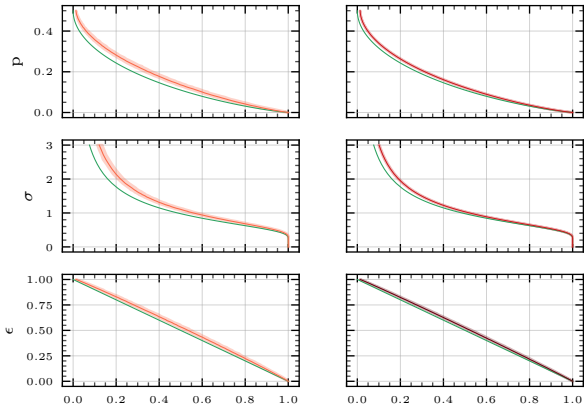

Rate

Supplement: supplementary_material [file attachment]

Bits

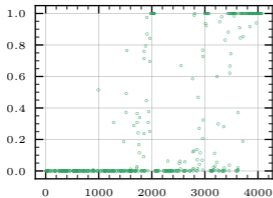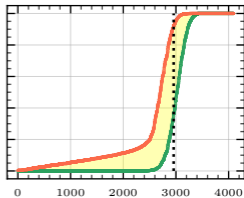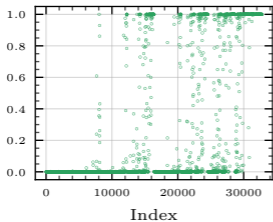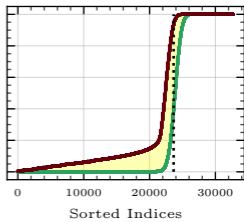

Supplement: supplementary_material [file attachment]

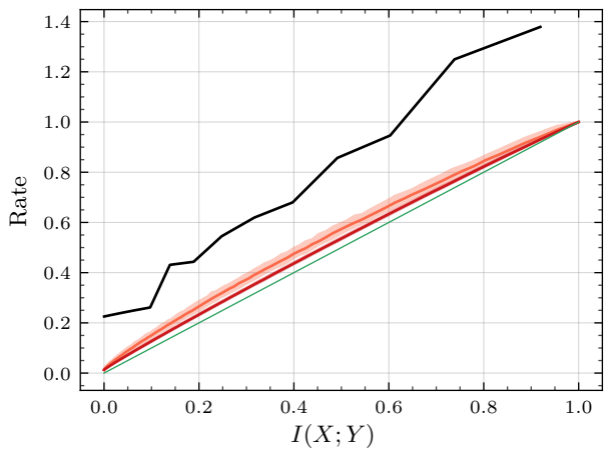

Supplement: supplementary_material [file attachment]
